# Supplementary material for: Fluorinated microemulsions as reaction media for fluorous nanoparticles
Source: Royal Society of Chemistry journal article supplement (doi:10.1039/b922260j), 2010-01-01
Supplement: b922260j.pdf [file b922260j.pdf]

# Fluorinated Microemulsions as Reaction Media for Fluorous Nanoparticles

## Electronic Supporting Information

*Martin J. Hollamby, Julian Eastoe, Kevin J. Mutch*

School of Chemistry, University of Bristol, Cantock's Close, Bristol BS8 1TS, UK

*Sarah Rogers, Richard K Heenan*

ISIS-CCLRC, Rutherford Appleton Laboratory, Chilton, Oxon OX11 0QX, UK

Contact email: [Julian.Eastoe@bristol.ac.uk](mailto:Julian.Eastoe@bristol.ac.uk)

## SANS data fitting

The form factor for polydisperse spheres each with radius  $R$  is defined as follows:<sup>1</sup>

$$P(Q) = \int_0^{\frac{\pi}{2}} |G(Q, R)|^2 g(R) dR \quad (1)$$

$$G(Q, R) = \left(\frac{4\pi}{3}\right) R^3 \Delta\rho \left[ \frac{3j_1(QR)}{QR} \right] \quad (2)$$

Where  $j_1(QR)$  is a first order spherical Bessel function and  $g(R)$  in this case defines a Schultz distribution of homogeneous spheres:

$$g(R) = \frac{\left(\frac{Z+1}{\bar{R}}\right)^{z+1} R^z \exp\left[-\left(\frac{Z+1}{\bar{R}}\right)R\right]}{\Gamma(Z+1)} \quad (3)$$

Where the width parameter,  $Z > -1$ ,  $\bar{R}$  is the mean of the distribution and polydispersity defined by an RMS deviation  $\sigma = \bar{R} / (Z+1)^{1/2}$ .

Fits to diHCF4-stabilised w/fc microemulsions included an attractive Ornstein-Zernike structure factor (OZ  $S(Q)$ ), as given in equation 4.

$$S(Q, \zeta) = 1 + \left[ \frac{\kappa}{1 + (Q\zeta)^2} \right] \quad (4)$$

This describes a decaying distribution, where  $\zeta$  is a correlation length, and  $\kappa$  is related to the strength of interactions via the isothermal compressibility.<sup>2</sup>

## Droplet polydispersity

Compared to normal H-AOT-based hydrocarbon microemulsions (polydispersity  $\sim 0.20$ )<sup>2,3</sup>, the fitted polydispersity of the F-microemulsions (F-MEs) may seem quite high at 0.28 or above. Polydispersity,  $p$  has been linked to interfacial rigidity,  $2K+K_{BAR}$  as follows:<sup>3,4</sup>

$$2K + K_{BAR} = \frac{k_B T}{8\pi\eta^2} - \frac{k_B T}{4\pi} f(\phi) \quad (5)$$

Interfacial rigidity has been shown to be strongly dependent on the total carbon number of the surfactant tails ( $C_{surf}$ ), and also on the concentration of surface-active co-solvents (discussed in the main paper).<sup>5</sup> The systems studied here consist of surfactants with  $C_{surf} = 8$  ( $= 2 \times 4$  carbons in diCF3) or  $C_{surf} = 10$  ( $2 \times 5$  C in diHCF4). Studies have been done using homologous twin-tailed di- $C_n$ -PC surfactants<sup>4</sup>, showing  $2K+K_{BAR}$  to be related to roughly the square of  $C_{surf}$  (actually,  $2K + K_{BAR} \sim C_{surf}^{2.4}$ ). This would imply that polydispersity should be approximately proportional to  $C_{surf}^{-1}$ . Using data reported therein,<sup>4</sup> the dependence of  $\ln(C_{surf})$  vs  $\ln(p)$  is shown in figure S1 below. The calculated gradient is -1.16; from this it can be predicted that for  $C_{surf} = 10$  diHCF4, polydispersity = 0.48. On this basis a polydispersity range of 0.28 – 0.49 as found for the F-microemulsions is entirely reasonable.

In addition, it is worth comparing the value found here of 0.28 with that found by Nave<sup>6</sup> for a di-chain sulfosuccinate hydrocarbon based system, comparable to the F-MEs studies here: H<sub>2</sub>O / diC6SS / n-hexanol / hexane (10 vol% alcohol co-solvent). This system was studied by SANS and data fitted to a polydispersity of 0.26 (Note  $C_{surf} = 12$  for diC6SS). If the same inverse relationship can be assumed as for di- $C_n$ -PC surfactants (a reasonable assumption) one would expect a polydispersity of 0.32 for  $C_{surf} = 10$ , which again agrees with the value of 0.28 typically found here.

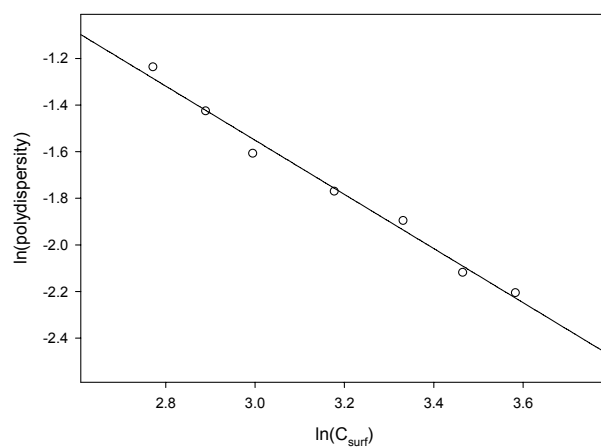

Figure S1: Dependence of polydispersity on surfactant chain length for twin-tailed phosphocholine di- $C_n$ -PC surfactants studied previously.<sup>4</sup> Solid line shows a linear fit, with gradient -1.16.

| Compound                           | s.l.d. x $10^{-10}$ / $\text{cm}^{-2}$ |
|------------------------------------|----------------------------------------|
| H <sub>2</sub> O                   | -0.56                                  |
| D <sub>2</sub> O (99%)             | 6.33                                   |
| diHCF <sub>4</sub>                 | 3.11                                   |
| diCF <sub>3</sub>                  | 3.15                                   |
| 1H,1H,5H-octafluoropentan-ol (OFP) | 2.98                                   |
| 2H,3H-perfluoropentane (HPFP)      | 3.11                                   |
| 1H-perfluorohexane (HPFH)          | 3.42                                   |

Table S1: Calculated scattering length densities (s.l.d.,  $\rho$ ) for chemicals used in this study.

### D<sub>2</sub>O vs H<sub>2</sub>O contrast in the F-MEs

In an attempt to gain additional structural information available by SANS, some samples were studied with D<sub>2</sub>O instead of H<sub>2</sub>O (Figure S2). As can be seen, apart from a difference in the absolute value of  $I(Q)$  (due to changes in contrast) there is little or no difference in the forms of the plots, implying that H<sub>2</sub>O or D<sub>2</sub>O can be used interchangeably in these systems without affecting largely the fit parameters.

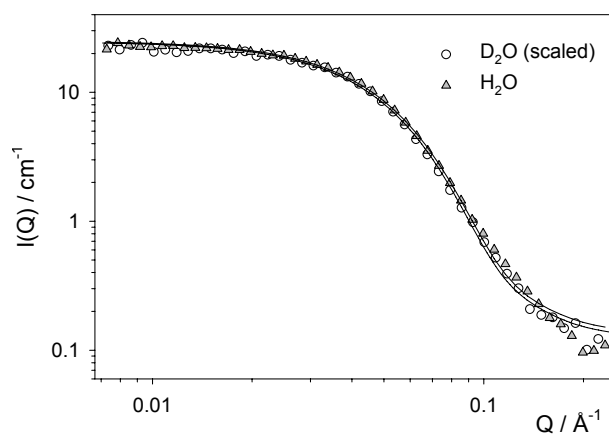

Figure S2: Comparison of core contrast SANS data from water / diCF<sub>3</sub> / OFP / HPFH microemulsions at  $w = 40$  using either H<sub>2</sub>O or D<sub>2</sub>O nanodroplets to generate contrast. Solid lines represent form factor fits to the Schultz polydisperse spheres model. [diCF<sub>3</sub>] = 100 mM, OFP : HPFH = 1 : 9 (v:v), T = 40°C. D<sub>2</sub>O data and calculated fit has been multiplied by a constant value of 2.3 to overlay onto the H<sub>2</sub>O data.

### Additional SANS data and Repeats

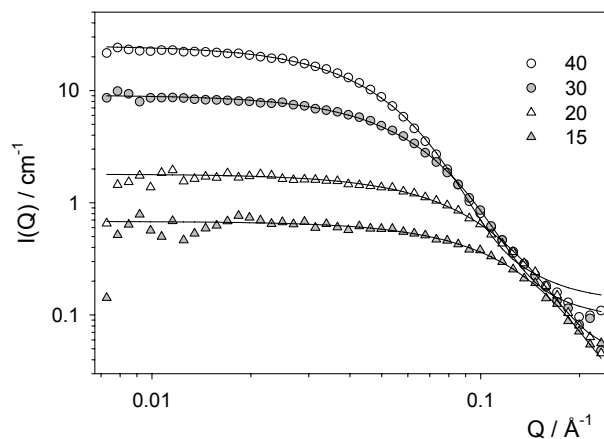

Figure S3: Core contrast SANS data from H<sub>2</sub>O / diCF<sub>3</sub> / OFP / HPFH microemulsions at different  $w = [\text{H}_2\text{O}] / [\text{diCF}_3]$  as indicated. Solid lines represent form factor fits to the Schultz polydisperse spheres model.  $[\text{diCF}_3] = 100 \text{ mM}$ , OFP : HPFH = 1 : 9 (v:v),  $T = 40^\circ\text{C}$

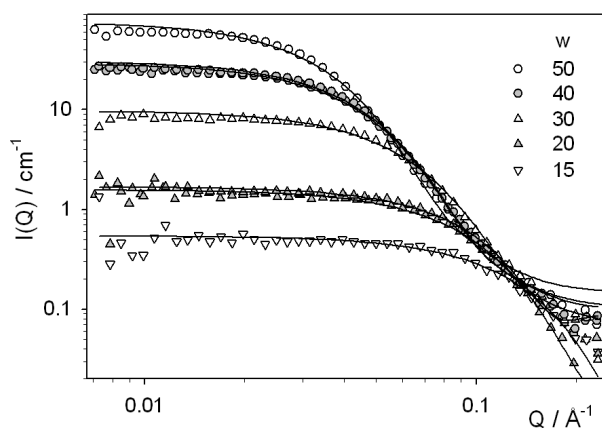

Figure S4: Core contrast SANS data from H<sub>2</sub>O / diCF<sub>3</sub> / OFP / HPFP microemulsion systems at different  $w = [\text{H}_2\text{O}] / [\text{diCF}_3]$  values indicated. Solid lines represent form factor fits to the Schultz polydisperse spheres model.  $[\text{diCF}_3] = 100 \text{ mM}$ , OFP : HPFH = 1 : 9 (v:v),  $T = 40^\circ\text{C}$ . Note for  $w = 20$  and

w 40 SANS measurements were repeated using freshly made samples. Good agreement was seen between these repeats.

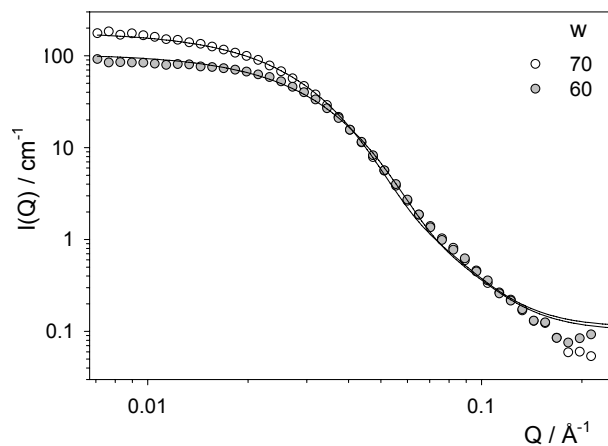

Figure S5: Core contrast SANS data from  $\text{D}_2\text{O}$  / diCF3 / OFP / HPFH microemulsions at high  $w = [\text{D}_2\text{O}] / [\text{diCF}_3]$  values indicated. Solid lines represent form factor fits to the Schultz polydisperse spheres model.  $[\text{diCF}_3] = 100 \text{ mM}$ , OFP : HPFH = 1 : 9 (v:v),  $T = 40^\circ\text{C}$

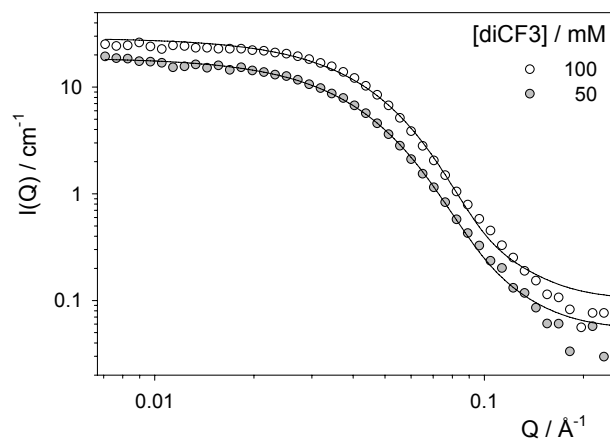

Figure S6: Core contrast SANS data from H<sub>2</sub>O / diCF<sub>3</sub> / OFP / HPFP microemulsions at different [diCF<sub>3</sub>] values indicated. Solid lines represent form factor fits to the Shultz polydisperse spheres model.  $w = 40$ , OFP : HPFH = 1 : 9 (v:v), T = 40°C.



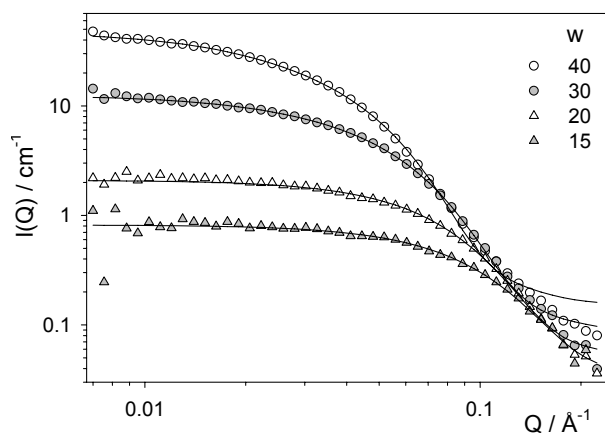

Figure S7 Core contrast SANS data from H<sub>2</sub>O / diHCF4 / OFP / HPFP microemulsions at different w values as indicated. Solid lines represent form factor fits to the Schultz polydisperse spheres model with an attractive OZ S(Q) where necessary. [diHCF4] = 100 mM, OFP : HPFH = 1 : 9 (v:v), T = 40°C

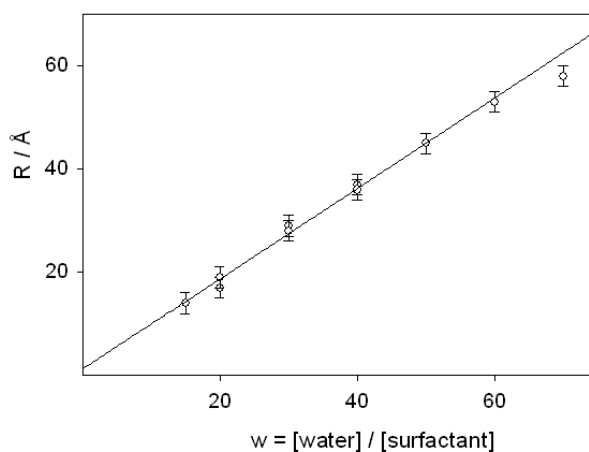

Figure S8: Water droplet radius R vs w for diCF3 – stabilized water / OFP / HPFH microemulsions. R values are calculated from SANS analysis of core contrasts (Table 2) corrected for polydispersity via  $R = \alpha(p) \cdot R_{bar}$ , as in equations 1, 2. Example error bars are shown. Linear fits from these data are also shown (gradient = 0.877).

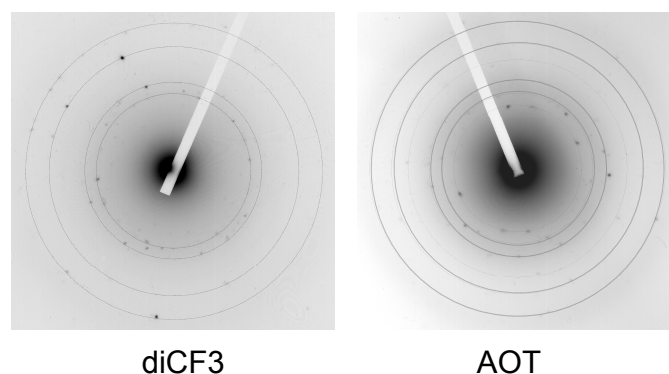

Figure S9: Example SAED patterns for diCF3- (left) and AOT-coated (right) Ag-NPs. Patterns were very faint, consisting of diffraction spots, so dashed-line circles have been added to the patterns to highlight important d-spacings. In increasing distance from the centre of each pattern, these rings represent (111), (200), (220) and (222) Ag cubic crystal planes (also see Table S1)

| <b>Ag cubic d-spacings [7]</b> | <b>diCF3 coated Ag-NPs</b> | <b>AOT-coated Ag-NPs</b> |
|--------------------------------|----------------------------|--------------------------|
| 2.36 (111)                     | 2.24                       | 2.34                     |
| 2.04 (200)                     | 1.92                       | 1.94                     |
| 1.44 (220)                     | 1.35                       | 1.61                     |
| 1.18 (222)                     | 1.16                       | 1.19                     |

Table S2: Comparison of d-spacing values obtained by SAED analysis and theoretical values for the cubic structure of silver for both diCF3 and AOT coated Ag-NPs.

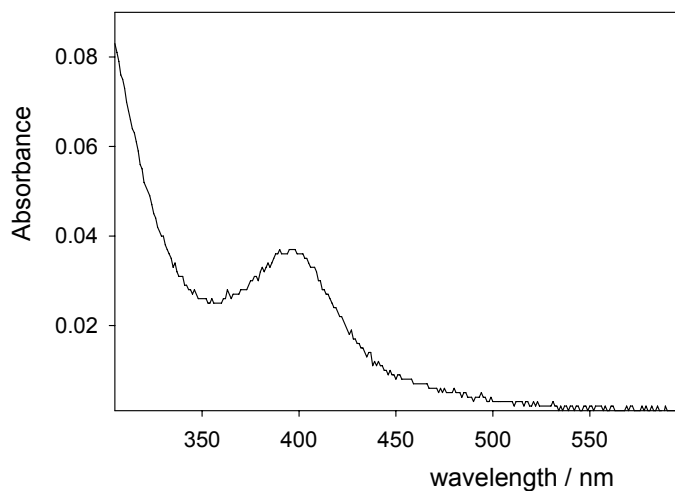

Figure S10. UV spectra of Ag nanoparticles redispersed in OFP / HPFP.

## References

1. M. Kotlarchyk and S.-H. Chen, *J. Chem. Phys.*, 1983, **79**, 2461-2469.
2. M. Kotlarchyk, S.-H. Chen, J. S. Huang and M. W. Kim, *Phys. Rev. A*, 1984, **29**, 2054-2069.
3. M. Gradzielski, D. Langevin and B. Farago, *Phys. Rev. E*, 1996, **53**, 3900-3919.
4. J. Eastoe, K. J. Hetherington, D. Sharpe, D. C. Steytler, S. Egelhaaf and R. K. Heenan, *Langmuir*, 1997, **13**, 2490-2493.
5. I. Szleifer, D. Kramer, A. Ben-Shaul, W. M. Gelbart and S. A. Safran, *J. Chem. Phys.*, 1990, **92**, 6800-6817.
6. S. Nave, PhD thesis, University of Bristol, Bristol, 2001.
